# Supplementary material for: Combined crystallographic and computational investigation of the solvent disorder present in a new tipiracil hydrochloride methanol solvate–hydrate
Source: Royal Society of Chemistry journal article supplement (doi:10.1039/d2ce00161f), 2022-01-01
Supplement: d2ce00161f1.pdf [file d2ce00161f1.pdf]

# Combined crystallographic and computational investigation of the Solvent Disorder present in a new Tipiracil hydrochloride methanol solvate - hydrate

Rafael Barbas,<sup>1</sup> Mercè Font-Bardia,<sup>2</sup> Dafne de Sande,<sup>1</sup> Antonio Frontera<sup>3,\*</sup> and Rafel Prohens<sup>1,\*</sup>

<sup>1</sup> Unitat de Polimorfisme i Calorimetria, Centres Científics i Tecnològics, Universitat de Barcelona, Baldiri Reixac 10, 08028 Barcelona, Spain.

<sup>2</sup> Unitat de Difracció de Raigs X, Centres Científics i Tecnològics, Universitat de Barcelona, Spain.

<sup>3</sup> Department of Chemistry, Universitat de les Illes Balears, Crta. de Valldemossa km 7.5, 07122 Palma, Spain

## Electronic Supplementary Information

|                                                                                        |    |
|----------------------------------------------------------------------------------------|----|
| 1. Crystal data and structure refinement .....                                         | 2  |
| 2. Characterization of Tipiracil hydrochloride methanol solvate–hydrate crystal form.. | 5  |
| 3. References .....                                                                    | 11 |

# 1. Crystal data and structure refinement

## 1.1 Tipiracil hydrochloride methanol solvate – hydrate (4:1:3, molar ratio)

Table S1. Crystal data and structure refinement for mo\_023XB102A\_0m\_a.

|                                   |                                                                                 |          |  |
|-----------------------------------|---------------------------------------------------------------------------------|----------|--|
| Identification code               | mo_023XB102A_0m_a                                                               |          |  |
| Empirical formula                 | C <sub>37</sub> H <sub>58</sub> Cl <sub>8</sub> N <sub>16</sub> O <sub>12</sub> |          |  |
| Formula weight                    | 1202.59                                                                         |          |  |
| Temperature                       | 100(2) K                                                                        |          |  |
| Wavelength                        | 0.71073 Å                                                                       |          |  |
| Crystal system                    | Orthorhombic                                                                    |          |  |
| Space group                       | P 21 21 21                                                                      |          |  |
| Unit cell dimensions              | a = 7.1291(2) Å                                                                 | α = 90°. |  |
|                                   | b = 13.5358(5) Å                                                                | β = 90°. |  |
|                                   | c = 27.2056(11) Å                                                               | γ = 90°. |  |
| Volume                            | 2625.29(16) Å <sup>3</sup>                                                      |          |  |
| Z                                 | 2                                                                               |          |  |
| Density (calculated)              | 1.521 Mg/m <sup>3</sup>                                                         |          |  |
| Absorption coefficient            | 0.502 mm <sup>-1</sup>                                                          |          |  |
| F(000)                            | 1248                                                                            |          |  |
| Crystal size                      | 0.290 x 0.073 x 0.062 mm <sup>3</sup>                                           |          |  |
| Theta range for data collection   | 2.704 to 33.782°.                                                               |          |  |
| Index ranges                      | -7 ≤ h ≤ 11, -19 ≤ k ≤ 21, -42 ≤ l ≤ 30                                         |          |  |
| Reflections collected             | 29776                                                                           |          |  |
| Independent reflections           | 10351 [R(int) = 0.0317]                                                         |          |  |
| Completeness to theta = 25.242°   | 99.1 %                                                                          |          |  |
| Absorption correction             | Semi-empirical from equivalents                                                 |          |  |
| Max. and min. transmission        | 0.7467 and 0.6558                                                               |          |  |
| Refinement method                 | Full-matrix least-squares on F <sup>2</sup>                                     |          |  |
| Data / restraints / parameters    | 10351 / 6 / 374                                                                 |          |  |
| Goodness-of-fit on F <sup>2</sup> | 1.048                                                                           |          |  |
| Final R indices [I > 2σ(I)]       | R1 = 0.0498, wR2 = 0.1175                                                       |          |  |
| R indices (all data)              | R1 = 0.0593, wR2 = 0.1255                                                       |          |  |
| Extinction coefficient            | n/a                                                                             |          |  |
| Largest diff. peak and hole       | 1.507 and -0.872 e.Å <sup>-3</sup>                                              |          |  |

Table S2. Hydrogen bonds for Tipiracil hydrochloride methanol solvate - hydrate [Å and °]

| Donor --- H...Acceptor | [ARU]             | d(D – H) | d(H...A) | d(D...A) | <(D - H...A) |
|------------------------|-------------------|----------|----------|----------|--------------|
| N1 --H1N ..Cl3         | [1/2+x,1/2-y,1-z] | 0.88     | 2.36     | 3.240(3) | 175          |
| N1 --H1N ..Cl3'        | [1/2+x,1/2-y,1-z] | 0.88     | 2.31     | 3.175(3) | 167          |
| N2 --H2N ..O3          | [ ]               | 0.88     | 1.86     | 2.743(3) | 176          |
| O2W --H2W ..Cl3        | [1+x,y,z]         | 0.84     | 1.81     | 2.578(7) | 151          |
| O2W --H2W ..Cl3'       | [1+x,y,z]         | 0.84     | 2.49     | 3.236(7) | 148          |
| N4 --H4A ..O1          | [1/2+x,1/2-y,1-z] | 0.88     | 1.98     | 2.817(4) | 159          |
| N4 --H4B ..O2W         | [ ]               | 0.88     | 1.86     | 2.722(6) | 165          |
| N9 --H9NA ..Cl3        | [1+x,1+y,z]       | 0.88     | 2.22     | 3.017(5) | 151          |

|      |        |        |                    |           |           |          |         |
|------|--------|--------|--------------------|-----------|-----------|----------|---------|
| N9   | --H9NA | ..Cl3' | [1+x,1+y,z]        | 0.88      | 2.52      | 3.370(5) | 162     |
| N5   | --H5N  | ..O1W  | [ ]                | 0.88      | 1.90      | 2.766(3) | 168     |
| N9   | --H9NB | ..Cl4  | [x,1+y,z]          | 0.88      | 2.30      | 3.155(3) | 165     |
| N6   | --H6N  | ..Cl4  | [2-x,1/2+y,3/2-z]  | 0.88      | 2.21      | 3.089(2) | 174     |
| O2W' | --H2A' | ..Cl4  | [ ]                | 0.79(4)   | 2.81(9)   | 3.089(6) | 103(6)  |
| O2W' | --H2A' | ..N9   | [x,-1+y,z]         | 0.79(4)   | 2.59(9)   | 3.047(8) | 119(10) |
| O2W' | --H2B' | ..Cl4  | [ ]                | 0.80(6)   | 2.63(7)   | 3.089(6) | 118(7)  |
| O1W  | --H1OA | ..Cl4  | [3/2-x,1-y,-1/2+z] | 0.80(3)   | 2.44(3)   | 3.221(2) | 165(3)  |
| O1W  | --H1OB | ..O2   | [ ]                | 0.796(17) | 2.071(17) | 2.855(3) | 168(4)  |

## 1.2 Comparative of crystal data parameters of Tipiracil hydrochloride crystal forms

Table S3. Crystal data of Tipiracil hydrochloride crystal forms

| Crystal data             | US 9.527.833 B2                    |                         | methanol solvate – hydrate<br>[4:1:3]                 |
|--------------------------|------------------------------------|-------------------------|-------------------------------------------------------|
|                          | Crystal I                          | Crystal III             |                                                       |
| Temperature (K)          | 291                                | - <sup>1</sup>          | 100                                                   |
| Crystal system           | Monoclinic                         | Monoclinic              | Orthorhombic                                          |
| Space group              | <i>P</i> 2 <sub>1</sub> / <i>n</i> | <i>P</i> 2 <sub>1</sub> | <i>P</i> 2 <sub>1</sub> 2 <sub>1</sub> 2 <sub>1</sub> |
| Unit cell dimensions     | a (Å)                              | 11.6006(9)              | 10.3221(14)                                           |
|                          | b (Å)                              | 10.3106(11)             | 9.8634(13)                                            |
|                          | b (Å)                              | 10.3036(10)             | 11.6643(16)                                           |
|                          | α (°)                              | 90                      | 90                                                    |
|                          | β (°)                              | 101.951(7)              | 100.317                                               |
|                          | γ (°)                              | 90                      | 90                                                    |
| Volume (Å <sup>3</sup> ) | 1205.7(2)                          | 1169.5(3)               | 2625.29(16)                                           |

<sup>1</sup> “room temperature” is reported

### 1.3 Comparative XRPD of Tipiracil hydrochloride crystal II and methanol solvate – hydrate

**Figure S1:** (a) XRPD diffractogram of crystal II reported in patent US 9.527.833 B2 and (b) bulk powder of Tipiracil hydrochloride methanol solvate - hydrate

(a)

Fig. 2

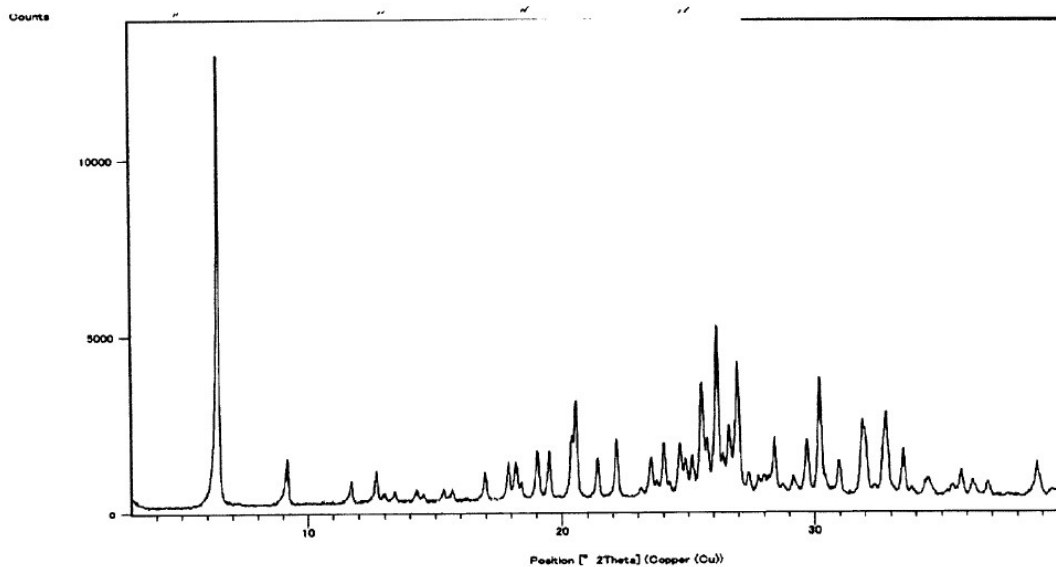

(b)

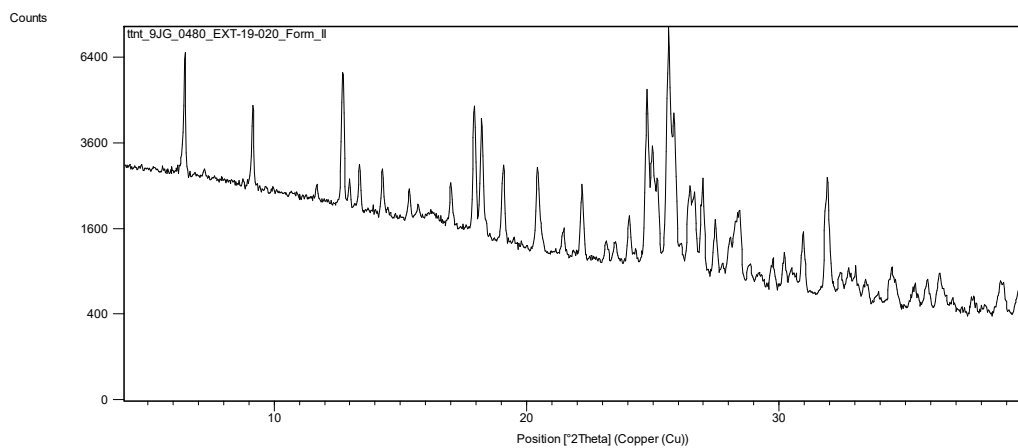

Table S4. 2 $\theta$  peaks of Tipiracil hydrochloride crystal II and methanol solvate – hydrate at 298K

| Tipiracil hydrochloride    | 2 $\theta$ peaks |      |      |      |      |      |
|----------------------------|------------------|------|------|------|------|------|
| Crystal II                 | 6.5              | 20.6 | 25.5 | 26.1 | 27.0 | 30.2 |
| methanol solvate – hydrate | 6.5              | 20.6 | 25.6 | 26.1 | 27.0 | 30.2 |

## 2.- Characterization of the Tipiracil hydrochloride methanol solvate – hydrate crystal form

**Powder X-ray Diffraction Analysis:** the powder diffractogram was indexed and the lattice parameters were refined by means of LeBail fits by means of Dicvol04,<sup>1</sup> and the space groups was determined from the systematic absences.

**Figure S2:** The XRPD of Tipiracil hydrochloride methanol solvate - hydrate has been indexed with the following proposed orthorhombic cell:  $a=27.27(7)$  Å,  $b=13.613(2)$  Å,  $c=7.1818(8)$  Å,  $V=2666.5(9)$  Å<sup>3</sup> (Figures of Merit:  $M= 35$ ,  $F= 84$ ), with number of impurities equal to zero. A  $P 2_12_12_1$  space group is compatible with the cell and the cell volume is compatible with 4 molecules of Tipiracil hydrochloride, 1 molecule of methanol and 3 molecules of water. ( $R_{wp}$ : 3.17;  $R_{exp}$ : 2.40),  $Z=2$

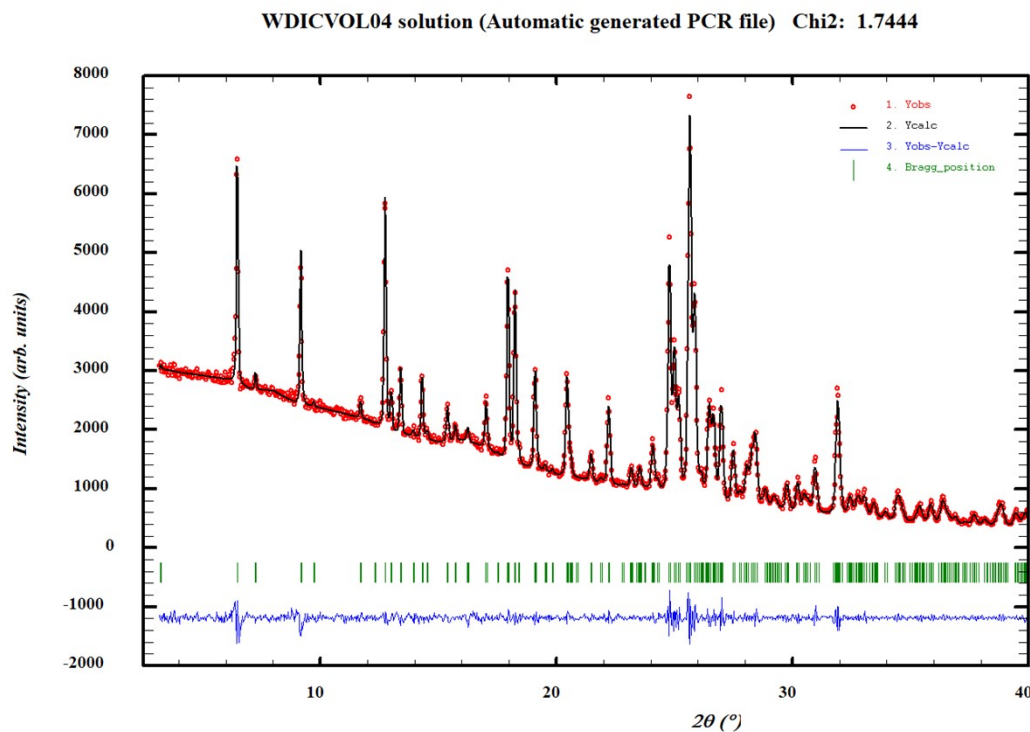

**Figure S3:** The structure was determined by single crystal X-ray diffraction at 100K showing a 4:1:3 (Tipiracil hydrochloride: methanol: water) molar ratio with the following orthorhombic cell:  $a=7.1291(2)$  Å,  $b=13.5358(5)$  Å,  $c=27.2056(11)$  Å,  $V=2625.29(12)$  Å<sup>3</sup>,  $Z=2$  and  $P 2_1 2_1 2_1$  space group. ( $R_{\text{int}}$  (%) = 3.17; R-Factor (%) = 5.10). Comparative XRPD diffractograms between bulk Tipiracil hydrochloride methanol solvate - hydrate and simulated from the cif is shown

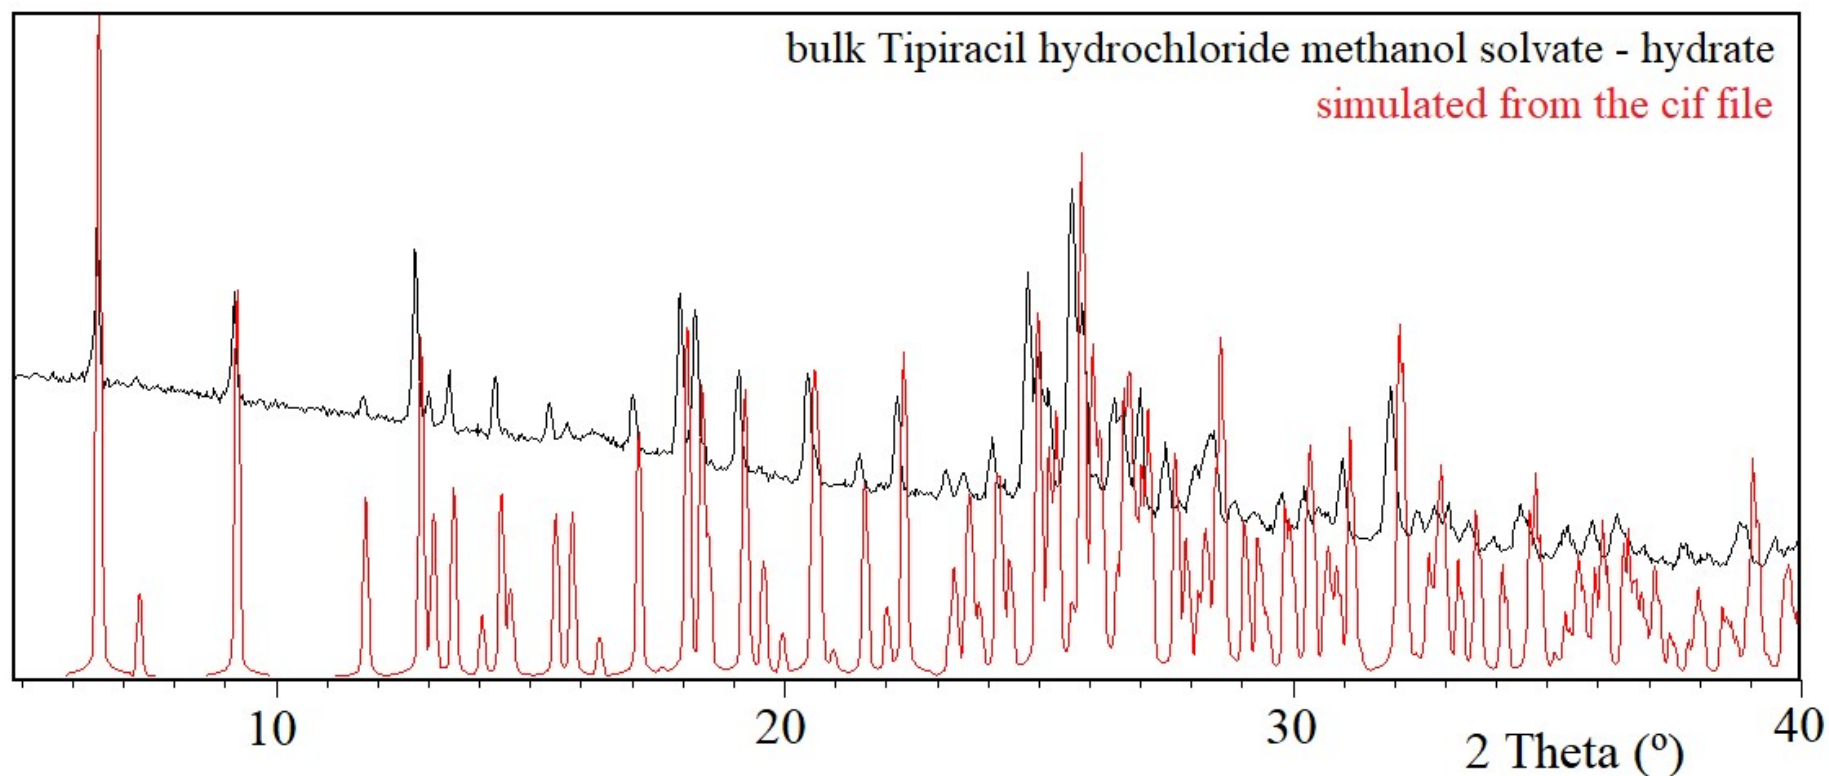

**Figure S4: DSC of Tipiracil hydrochloride methanol solvate – hydrate.** Differential scanning calorimetry analysis was carried out by means of a Mettler-Toledo DSC-822e calorimeter. Experimental conditions: aluminium crucibles of 40  $\mu\text{L}$  volume, atmosphere of dry nitrogen with 50 mL/min flow rate, heating rate of 10  $^{\circ}\text{C}/\text{min}$ . The calorimeter was calibrated with indium of 99.99% purity (mp: 156.6  $^{\circ}\text{C}$ ;  $\Delta\text{H}$ : 28.31 J/g).

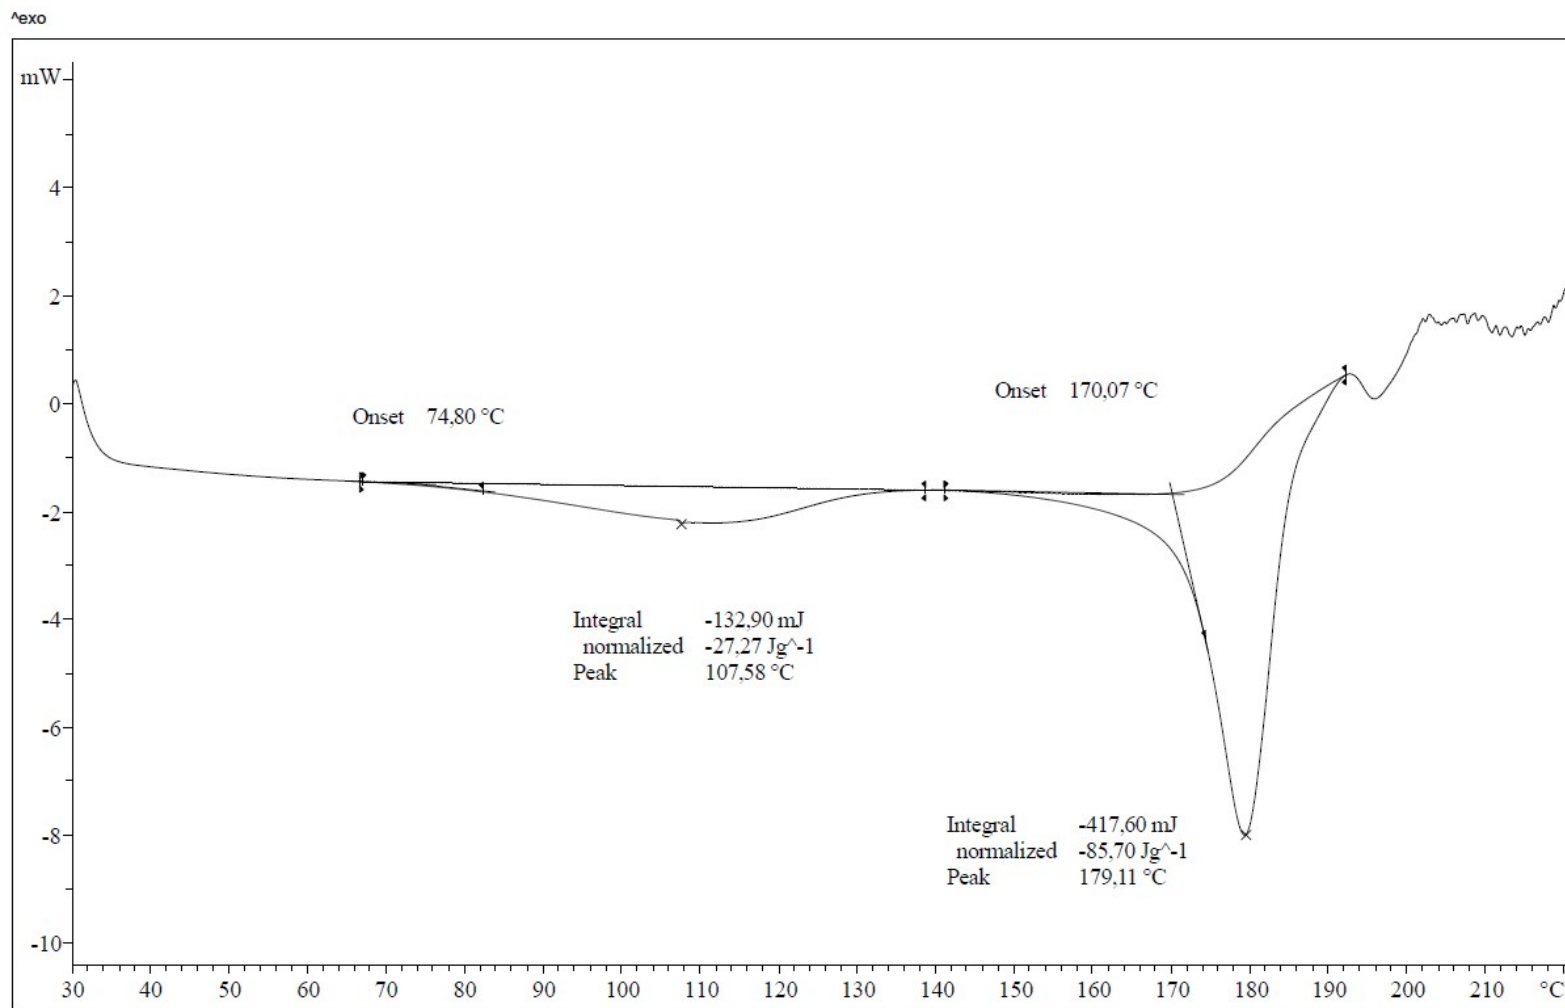

Figure S5: TGA of Tipiracil hydrochloride methanol solvate - hydrate

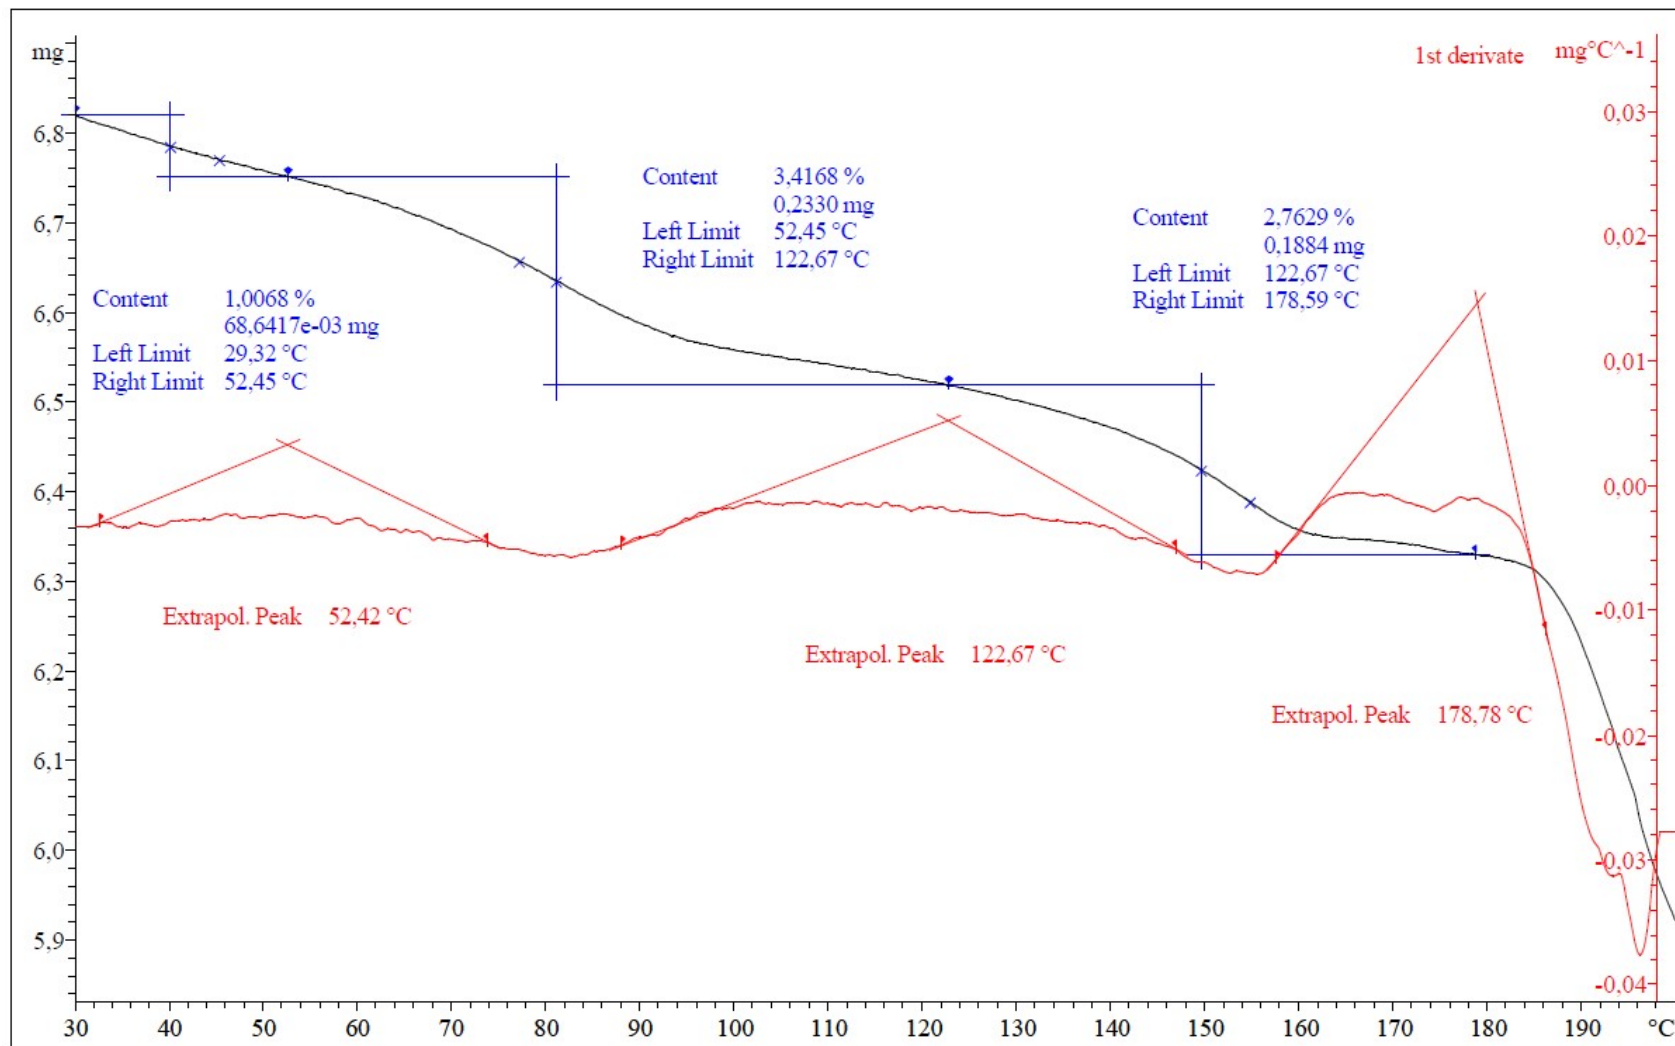



**Figure S6: XRPD diffractograms of bulk Tipiracil hydrochloride methanol solvate - hydrate and the resulting solid after DVS analysis. Enlargement from 5 to 30° 2θ.**

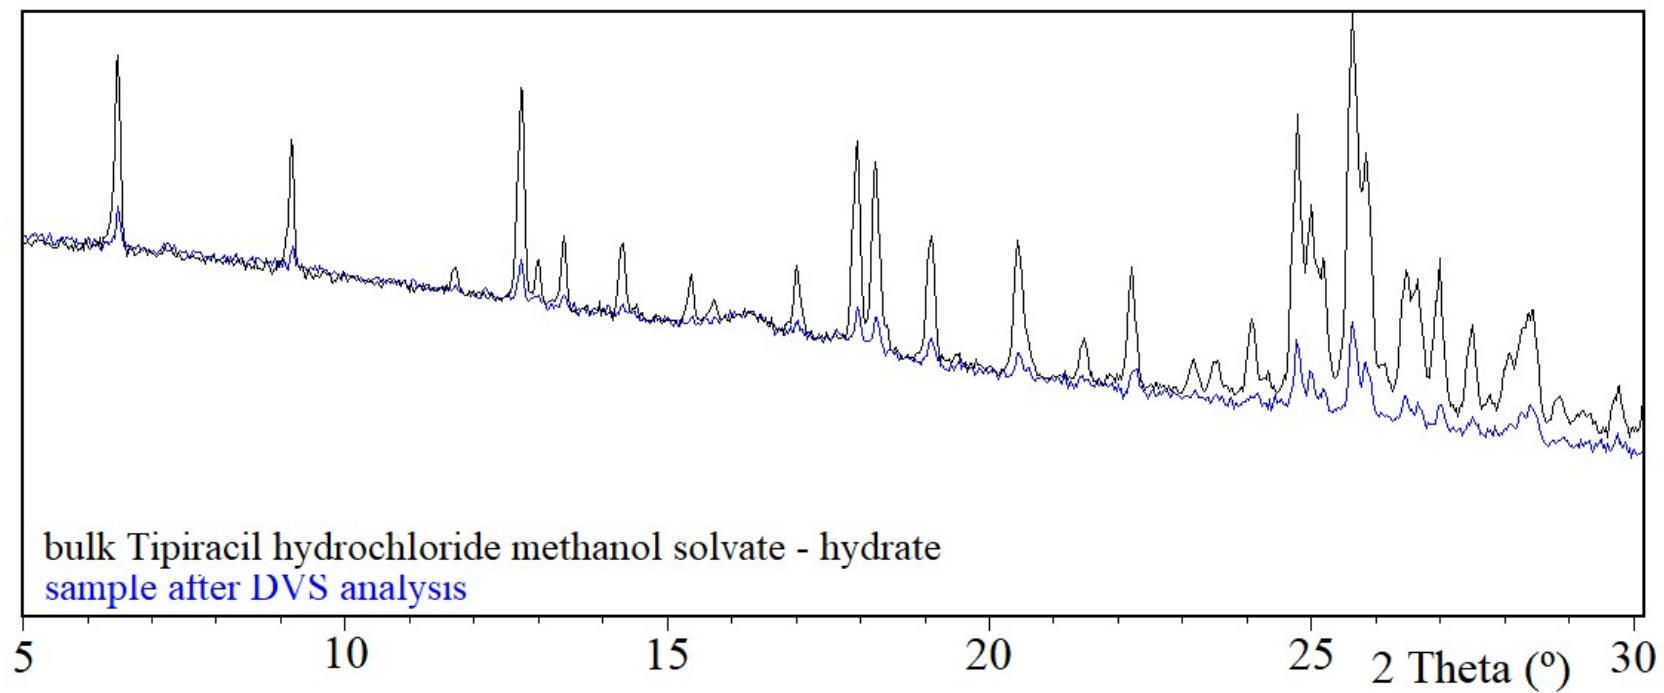

### 3. References

- [1] Boultif, A.; Louër, D. Indexing of powder diffraction patterns for low-symmetry lattices by the successive dichotomy method *J. Appl. Crystallogr.* 1991, **24**, 987-993.
